# Supplementary material
Source: Royal Society of Chemistry journal article supplement (doi:10.1039/d6nj00072j)
Supplement: d6nj00072j1.pdf [file d6nj00072j1.pdf]

## **Role of Hydrothermal Reaction Time on Defect-and Strain-Engineered Few-Layered MoS<sub>2</sub> Nanoflowers for Tunable Band Gap and Enhanced Visible-Light Photocatalysis**

**Bhagyalakshmi Balan,<sup>a</sup> Minu Elizabeth Thomas,<sup>a</sup> Treesa K. James<sup>a</sup> and Suresh Mathew<sup>a\*</sup>**

a. School of Chemical Sciences, Mahatma Gandhi University, Kottayam, Kerala – 686 560, India

E-mail: [bhagyalakshmi.udaya@gmail.com](mailto:bhagyalakshmi.udaya@gmail.com), [sureshmathewmgu@gmail.com](mailto:sureshmathewmgu@gmail.com)

### **Supporting Information**

#### **Text S1. Materials used**

Ammonium heptamolybdate tetrahydrate ((NH<sub>4</sub>)<sub>6</sub>Mo<sub>7</sub>O<sub>24</sub>·4H<sub>2</sub>O), and methylene blue (MB) were obtained from Merck Specialities Pvt. Ltd and thiourea (CH<sub>4</sub>N<sub>2</sub>S) from Himedia Chemicals. Carbon black, poly(vinylidene fluoride) (PVDF), N-methyl pyrrolidone (NMP), ciprofloxacin (CIP) and tetracycline (TC) from Sigma Aldrich. All the reagents used in the synthesis were analytically pure and used without further purification.

#### **Text S2. Materials characterization**

FT-IR spectra were used to identify the functional groups in MoS<sub>2</sub> samples, recorded on a PerkinElmer 400 Spectrometer in the 4000-400 cm<sup>-1</sup> range. The crystal structures were studied using a Rigaku Mini Flex 600 powder X-ray diffractometer with monochromatic Cu K $\alpha$  ( $\lambda$  = 0.154 nm) radiation. Raman spectra of the samples were obtained from a WITEC ALPHA300 RA - Confocal Raman Microscope with a 532 nm DPSS laser as the excitation laser. The morphology and microstructure of the samples were determined using an FE-SEM (MAIA3 XMH model microscope) and an HR-TEM (JEOL JEM-2100 microscope) instrument. The samples' chemical states and surface chemistry were investigated through XPS analysis (Omicron Nanotechnology XPS was equipped with a DR400 X-ray source). The UV-visible diffuse reflectance spectrum (UV-DRS) samples were obtained from a Shimadzu UV-2600 UV-visible spectrophotometer. Photoluminescence (PL) spectra were obtained using a PerkinElmer Fluorescence Spectrometer FL 8500. EPR analyses were carried out at room temperature using a Bruker EMX MICRO X spectrometer. The specific surface area was measured using Nova Touch L $\times$ 2 by a Quantachrome analyzer.

#### **Text S3. Electrochemical characterizations**

The electrochemical activity of the samples was analyzed using a Biologic SP 200 electrochemical workstation using a three-electrode system. Platinum wire and Ag/AgCl are the counter and reference electrodes, respectively. For working electrode preparation, an 8:1:1 ratio of photocatalyst, carbon black, and PVDF in NMP was prepared and coated onto an FTO glass plate, approximately over an area of 1.0  $\times$  1.0 cm<sup>2</sup>. Then, the FTO glass sheet was dried

at 60°C for 6 hours. Electrochemical impedance spectroscopy (EIS) and Mott-Schottky (MS) analysis were studied in 0.5 M H<sub>2</sub>SO<sub>4</sub>. The applied potential is converted to the reversible hydrogen electrode (RHE) by Eq. 1.

$$V_{RHE} = V_{\frac{Ag}{AgCl}} + 0.059 \times pH + V_{Ag/AgCl}^0 \quad (1)$$

Where  $V_{RHE}$  denotes the converted potential vs. RHE,  $V_{Ag/AgCl}$  is the measured potential w.r.t. the Ag/AgCl electrode, and  $V_{Ag/AgCl}^0 = 0.1976$  at 25°C.

#### **Text S4. Computational details**

Density functional theory (DFT) calculations were performed using Gaussian 16.C.01.<sup>1</sup> to investigate the structural stability, electronic properties, and pollutant adsorption behavior of few-layer MoS<sub>2</sub>. Cluster models representing 1-5 layers of MoS<sub>2</sub> were constructed by truncating the hexagonal 2H-MoS<sub>2</sub> lattice while preserving the local coordination geometry around Mo and S atoms. All structures were analyzed using the B3LYP-D3(BJ) functional to account for long-range dispersion interactions, which are essential for layered materials. The LANL2DZ effective core potential and basis set were applied to molybdenum atoms, while the 6-311+G(d,p) basis set was used for sulphur, oxygen, carbon, nitrogen, fluorine, and hydrogen atoms.

Cohesive energy was employed as it encapsulates the stability acquired when monolayers assemble into few-layer MoS<sub>2</sub>, thereby directly reflecting the layer-dependent photocatalytic behavior, rather than formation energy, which pertains to elemental processes rather than interlayer interactions.<sup>2</sup> To quantify stacking stability, the cohesive energy per layer ( $E_{coh}(n)$ ) for an n-layer cluster, the computation was performed using Eq. 2.

$$E_{coh}(n) = \frac{nE_1 - E_n}{n} \quad (2)$$

where  $E_1$  and  $E_n$  are the total electronic energies of the monolayer and n-layer cluster, respectively.

The adsorption of TC and CIP on monolayer MoS<sub>2</sub> was evaluated by building antibiotic-MoS<sub>2</sub> composite models with the antibiotic molecules placed in their lowest-energy orientations above the MoS<sub>2</sub> basal plane. Adsorption energies were calculated by Eq.3.

$$E_{ads} = E_{MoS_2 + antibiotic} - (E_{MoS_2} + E_{antibiotic}) \quad (3)$$

where negative values indicate favourable adsorption.

Molecular electrostatic potential (MESP) maps were generated to illustrate regions of electron richness and electron deficiency pertinent to photocatalytic reactivity. Frontier molecular orbital (FMO) energies, including the highest occupied molecular orbital (HOMO) and the lowest unoccupied molecular orbital LUMO, were derived from Gaussian output files to elucidate variations in the band gap with an increasing number of MoS<sub>2</sub> layers and to evaluate interfacial charge transfer between MoS<sub>2</sub> and dye molecules. All visualizations were produced utilizing GaussView 6.1.1.<sup>3</sup> Secondary non-covalent interactions (NCI) were examined using the Multiwfn program, with the corresponding isosurfaces rendered and visualized in Visual molecular dynamics (VMD).<sup>4,5</sup>

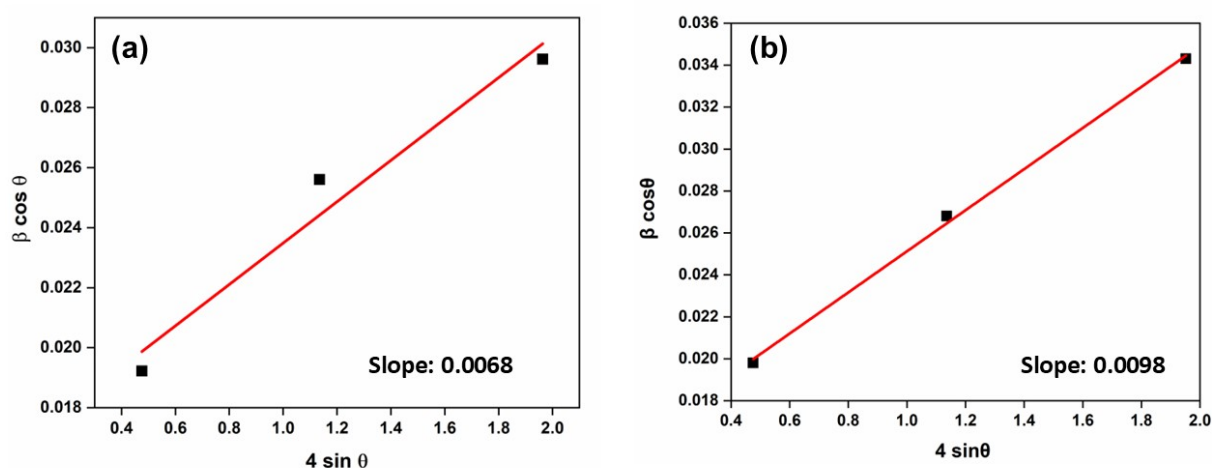

**Fig. S1.** W-H plots of MoS<sub>2</sub> samples.

| <b>Table S1: Calculation of strain in MoS<sub>2</sub> NFs</b> |              |                             |                                        |                                             |
|---------------------------------------------------------------|--------------|-----------------------------|----------------------------------------|---------------------------------------------|
| <b>Sample</b>                                                 | <b>(hkl)</b> | <b>2<math>\theta</math></b> | <b>d<sub>hkl</sub> (Å<sup>o</sup>)</b> | <b><math>\epsilon</math> (no dimension)</b> |
| <b>MoS<sub>2</sub>-1</b>                                      | (002)        | 13.86                       | 6.38                                   | <b>0.0068</b>                               |
|                                                               | (100)        | 33.07                       | 2.70                                   |                                             |
|                                                               | (110)        | 58.83                       | 1.56                                   |                                             |
| <b>MoS<sub>2</sub>-2</b>                                      | (002)        | 13.77                       | 6.42                                   | <b>0.0098</b>                               |
|                                                               | (100)        | 33.39                       | 2.68                                   |                                             |
|                                                               | (110)        | 58.53                       | 1.57                                   |                                             |

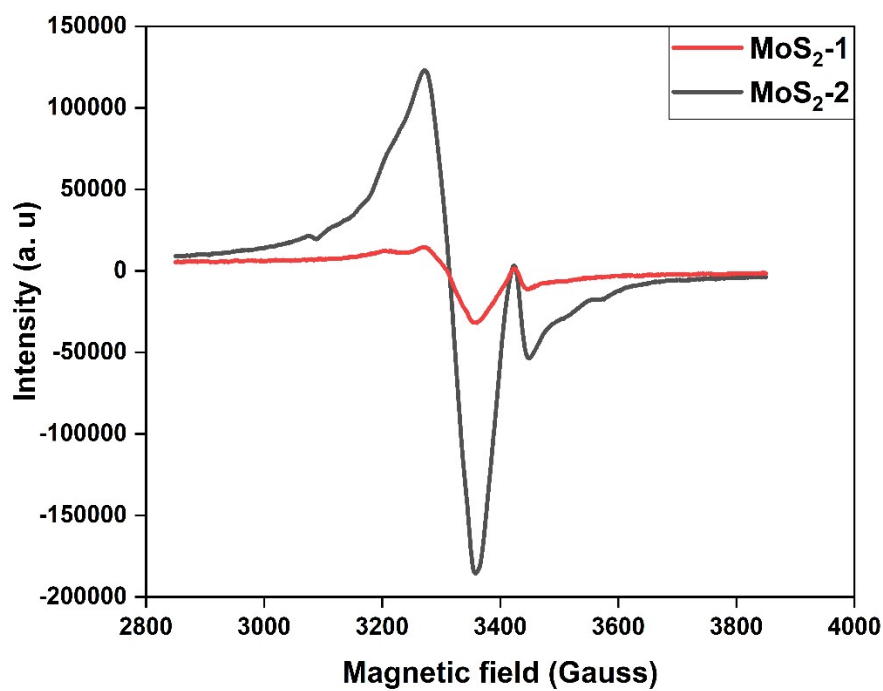

**Fig. S2.** EPR analysis of MoS<sub>2</sub> samples.

| <b>Table S2: ICP-OES analysis data</b> |           |          |                  |
|----------------------------------------|-----------|----------|------------------|
| <b>Sample</b>                          | <b>Mo</b> | <b>S</b> | <b>Mo:S Raio</b> |
| MoS <sub>2</sub> -1                    | 34.10     | 65.90    | 1:1.93           |
| MoS <sub>2</sub> -2                    | 34.32     | 65.67    | 1:1.91           |

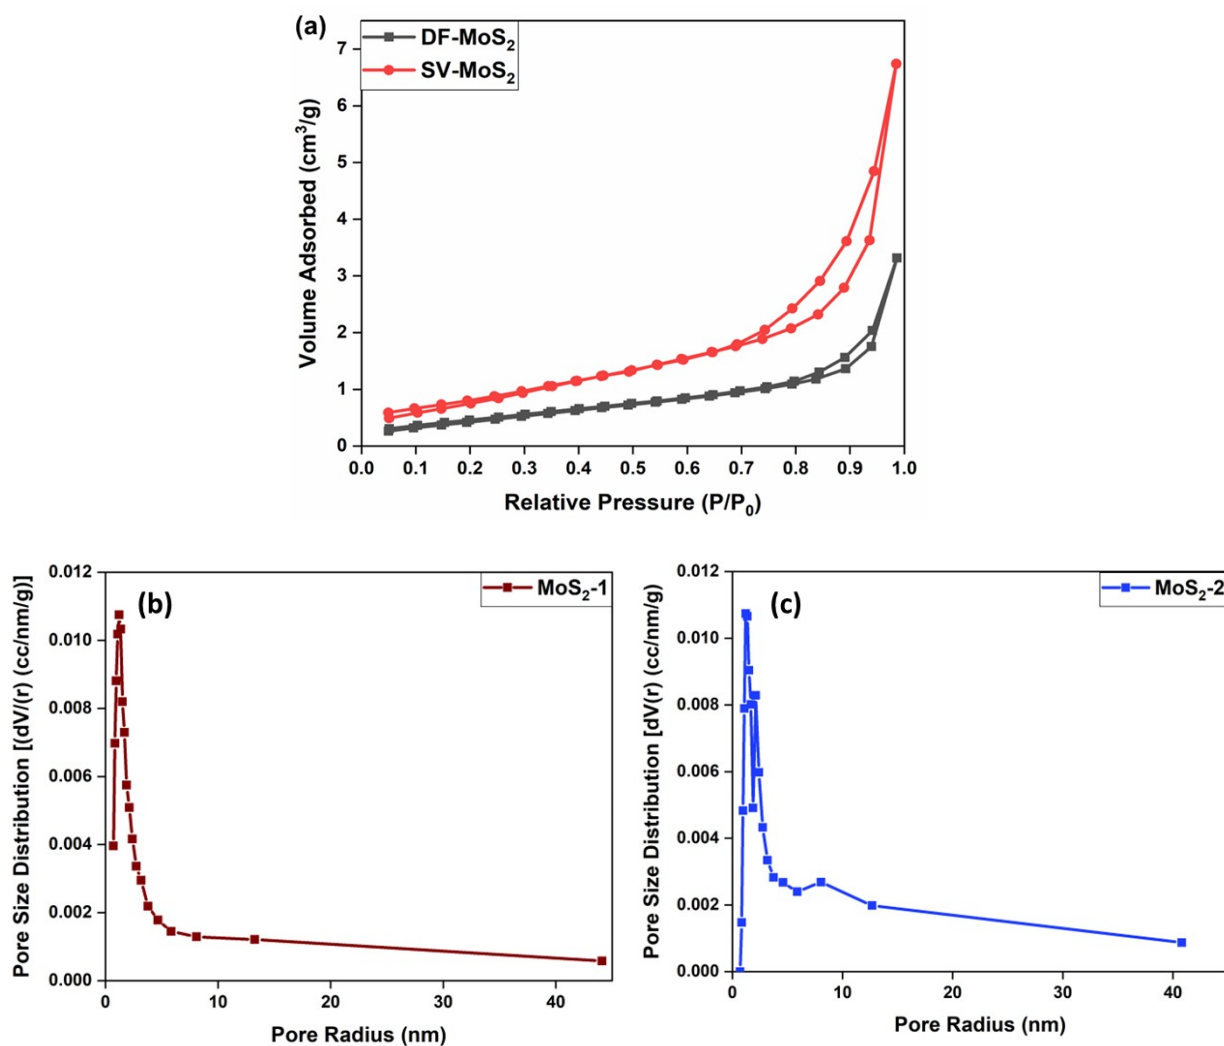

Fig. S3. (a) BET isotherm of MoS<sub>2</sub> samples; (b) Pore-size distribution curve of MoS<sub>2</sub> samples.

**Table S3:** Surface and porous parameters of the samples

| Sample              | BET surface area (m <sup>2</sup> /g) | Avg. pore radius (nm) | Avg. pore volume (cm <sup>3</sup> /g) |
|---------------------|--------------------------------------|-----------------------|---------------------------------------|
| MoS <sub>2</sub> -1 | 20.95                                | 5.98                  | 0.062                                 |
| MoS <sub>2</sub> -2 | 25.47                                | 6.85                  | 0.087                                 |

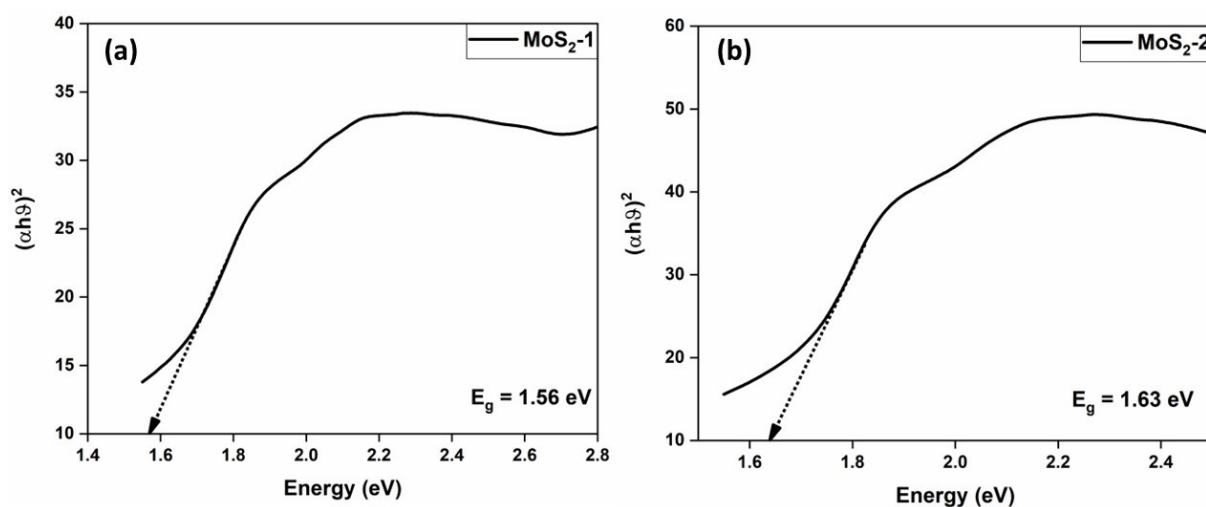

**Fig. S4.** Tauc plot of MoS<sub>2</sub> samples.

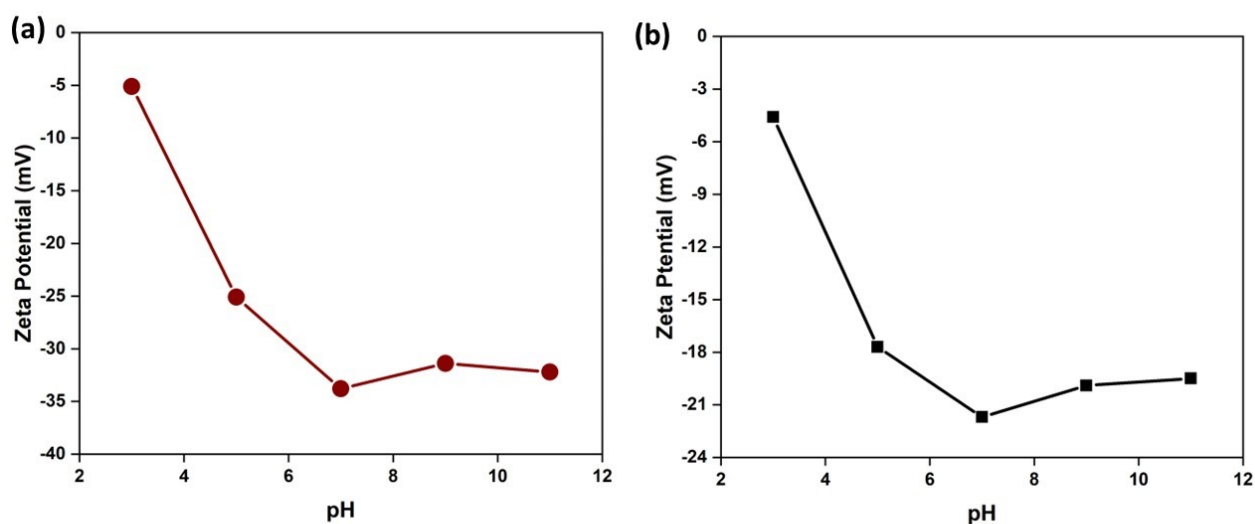

**Fig. S5.** Zeta potential of MoS<sub>2</sub>-2 as a function of pH in the photocatalytic degradation of (a) TC and (b) CIP.

**Table S4:** Comparison of synthesized MoS<sub>2</sub> NFs with other catalysts

| Catalyst                                                                                                          | Dye | Catalyst dosage (g/L) | Dye concentration (mg/L) | pH   | Light source                                            | Degradation Percentage (%) | Time taken for degradation (min) | Ref.      |
|-------------------------------------------------------------------------------------------------------------------|-----|-----------------------|--------------------------|------|---------------------------------------------------------|----------------------------|----------------------------------|-----------|
| NiCo <sub>2</sub> O <sub>4</sub> /ZnO                                                                             | MB  | 0.4                   | 10                       | 7    | Visible lamp (400 W)                                    | 92.85                      | 120                              | 6         |
| SnO <sub>2</sub> @g-C <sub>3</sub> N <sub>4</sub>                                                                 | MB  | 0.1                   | 100                      | 6    | Sun light                                               | 97                         | 45                               | 7         |
| CoNi <sub>2</sub> S <sub>4</sub> /MoS <sub>2</sub>                                                                | MB  | 0.2                   | 10                       | 11   | Visible light (250 W)                                   | 100                        | 90                               | 8         |
| C-TiO <sub>2</sub> -MoS <sub>2</sub>                                                                              | MB  | 0.2                   | 100                      | 11   | Xenon lamp (3 W)                                        | 99.6                       | 45                               | 9         |
| Bi <sub>2</sub> WO <sub>6</sub> -ZnO/GO                                                                           | MB  | 1                     | 20                       | 3.04 | Visible light                                           | 87.9                       | 180                              | 10        |
| MoS <sub>2</sub> /Co <sub>3</sub> O <sub>4</sub>                                                                  | MB  | 0.4                   | 10                       | -    | Visible light (250 W)                                   | 99.5                       | 120                              | 11        |
| Mn-doped rGO/NiO/g-C <sub>3</sub> N <sub>4</sub>                                                                  | MB  | 1                     | 10                       | 11   | UV lamp (85 W)                                          | 98.3                       | 90                               | 12        |
| MoS <sub>2</sub> NFs                                                                                              | MB  | 0.2                   | 10                       | 6.5  | Natural sunlight                                        | 98.46                      | 75                               | This work |
| Mn <sub>2</sub> O <sub>3</sub> @GO-MoS <sub>2</sub>                                                               | TC  | 0.1                   | 50                       | 6    | Visible light (400 W)                                   | 98.91                      | 15                               | 13        |
| MoS <sub>2</sub> /Graphene aerogel                                                                                | TC  | 0.5                   | 5                        | 7    | Hg vapour lamp (250 W)                                  | 97                         | 120                              | 14        |
| MoS <sub>2</sub> /Graphene aerogel                                                                                | TC  | 0.5                   | 5                        | 7    | Hg lamp (250 W)                                         | 95                         | 90                               | 15        |
| MoS <sub>2</sub> /CuBi <sub>2</sub> O <sub>4</sub>                                                                | TC  | 0.6                   | 5                        | 5.3  | Xenon lamp (100 W)                                      | 83                         | 180                              | 16        |
| g-C <sub>3</sub> N <sub>4</sub> /Fe <sub>3</sub> O <sub>4</sub> /In <sub>2</sub> O <sub>3</sub> /MoS <sub>2</sub> | TC  | 0.2                   | 10                       | 9    | Xenon lamp (300 W)                                      | 94.1                       | 240                              | 17        |
| Biochar silica@BiOCl                                                                                              | TC  | 0.2                   | 10                       | 11   | Xenon lamp (300 W)                                      | 96.2                       | 90                               | 18        |
| β-In <sub>2</sub> S <sub>3</sub>                                                                                  | TC  | 0.5                   | 10                       | 6.5  | LED lamp (60 W)                                         | 85.5                       | 240                              | 19        |
| MoS <sub>2</sub> NFs                                                                                              | TC  | 0.2                   | 10                       | 7    | Natural sunlight                                        | 99                         | 75                               | This work |
| CuNb <sub>13</sub> O <sub>33</sub> /g-C <sub>3</sub> N <sub>5</sub>                                               | CIP | 0.75                  | 10                       | 7    | Tungsten halogen lamp (500 W)                           | 98                         | 120                              | 20        |
| CdS/CuO                                                                                                           | CIP | 0.5                   | 10                       | 5    | Visible light                                           | 100                        | 180                              | 21        |
| MoS <sub>2</sub> /Bi <sub>2</sub> WO <sub>6</sub>                                                                 | CIP | 0.4                   | 20                       | 7    | Xe lamp (300W)                                          | 99.6                       | 60                               | 22        |
| C-dots/ZnO                                                                                                        | CIP | 0.6                   | 12                       | 6.3  | Natural sunlight                                        | 98                         | 110                              | 23        |
| MgFe <sub>2</sub> O <sub>4</sub> /UiO-67                                                                          | CIP | 0.25                  | 10                       | 8.02 | LED lamps (300 W)                                       | 99.62                      | 90                               | 24        |
| Fe <sub>2</sub> O <sub>3</sub> /Fe <sub>3</sub> O <sub>4</sub> /Cr <sub>2</sub> O <sub>3</sub> /rGO               | CIP | 0.6                   | 10                       | 7    | Natural sunlight (Av. Intensity 730 W m <sup>-2</sup> ) | 92.1                       | 120                              | 25        |
| ZnMn <sub>2</sub> O <sub>4</sub> /V <sub>2</sub> O <sub>5</sub>                                                   | CIP | 0.4                   | 20                       | 6    | Xenon lamp (300 W)                                      | 98.7                       | 100                              | 26        |
| MoS <sub>2</sub> NFs                                                                                              | CIP | 0.2                   | 10                       | 7    | Natural sunlight                                        | 98.30                      | 90                               | This work |

| Parameters                                          | Tap water    | River water  |
|-----------------------------------------------------|--------------|--------------|
| pH                                                  | 6.27         | 6.59         |
| Na <sup>+</sup> (mg L <sup>-1</sup> )               | 5.56         | 1.62         |
| K <sup>+</sup> (mg L <sup>-1</sup> )                | 1.44         | 0.46         |
| Mg <sup>2+</sup> (mg L <sup>-1</sup> )              | 4.76         | 2.38         |
| Ca <sup>2+</sup> (mg L <sup>-1</sup> )              | 3.92         | 3.92         |
| SO <sub>4</sub> <sup>2-</sup> (mg L <sup>-1</sup> ) | 0.28         | 0.17         |
| Cl <sup>-</sup> (mg L <sup>-1</sup> )               | 0.29         | 0.16         |
| NO <sub>3</sub> <sup>-</sup> (mg L <sup>-1</sup> )  | 0.18         | 0.17         |
| F <sup>-</sup> (mg L <sup>-1</sup> )                | Not detected | Not detected |
| PO <sub>4</sub> <sup>3-</sup> (mg L <sup>-1</sup> ) | Not detected | Not detected |

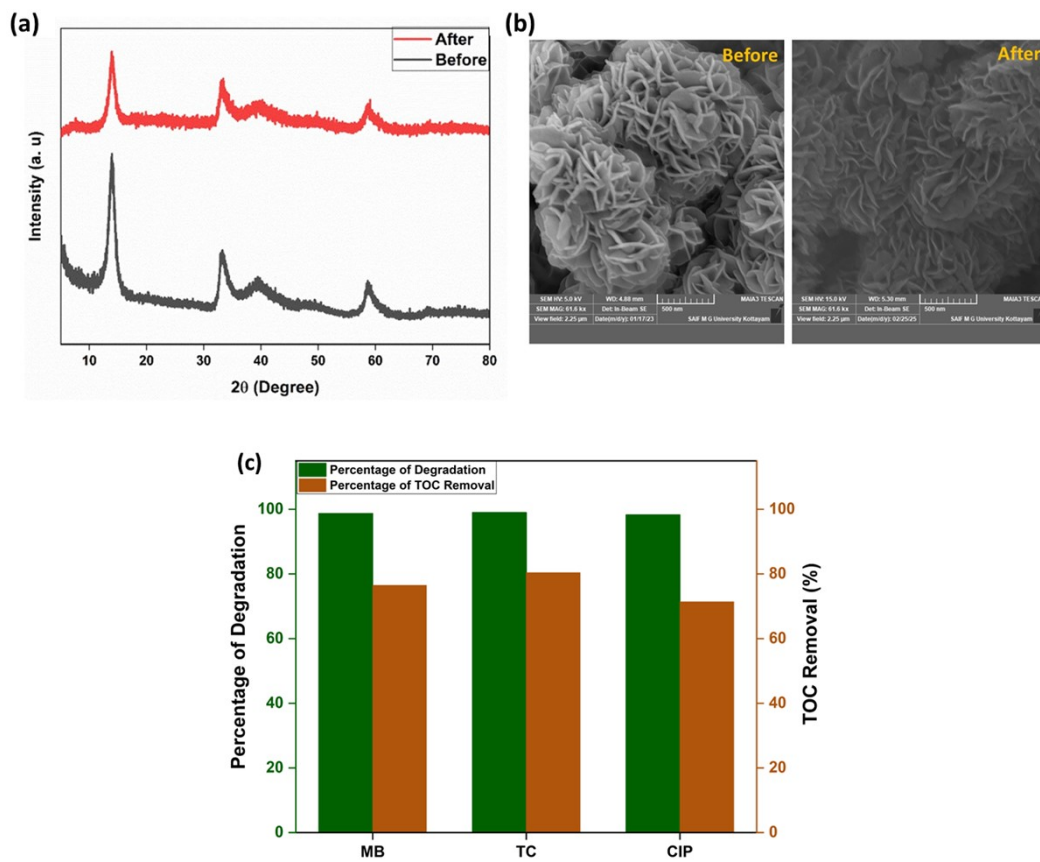

**Fig. S6.** Comparison of XRD (a) and FE-SEM images (b) of MoS<sub>2</sub>-2 before and after degradation; (c) Percentage of degradation and TOC removal of MoS<sub>2</sub>-2 in tap water.

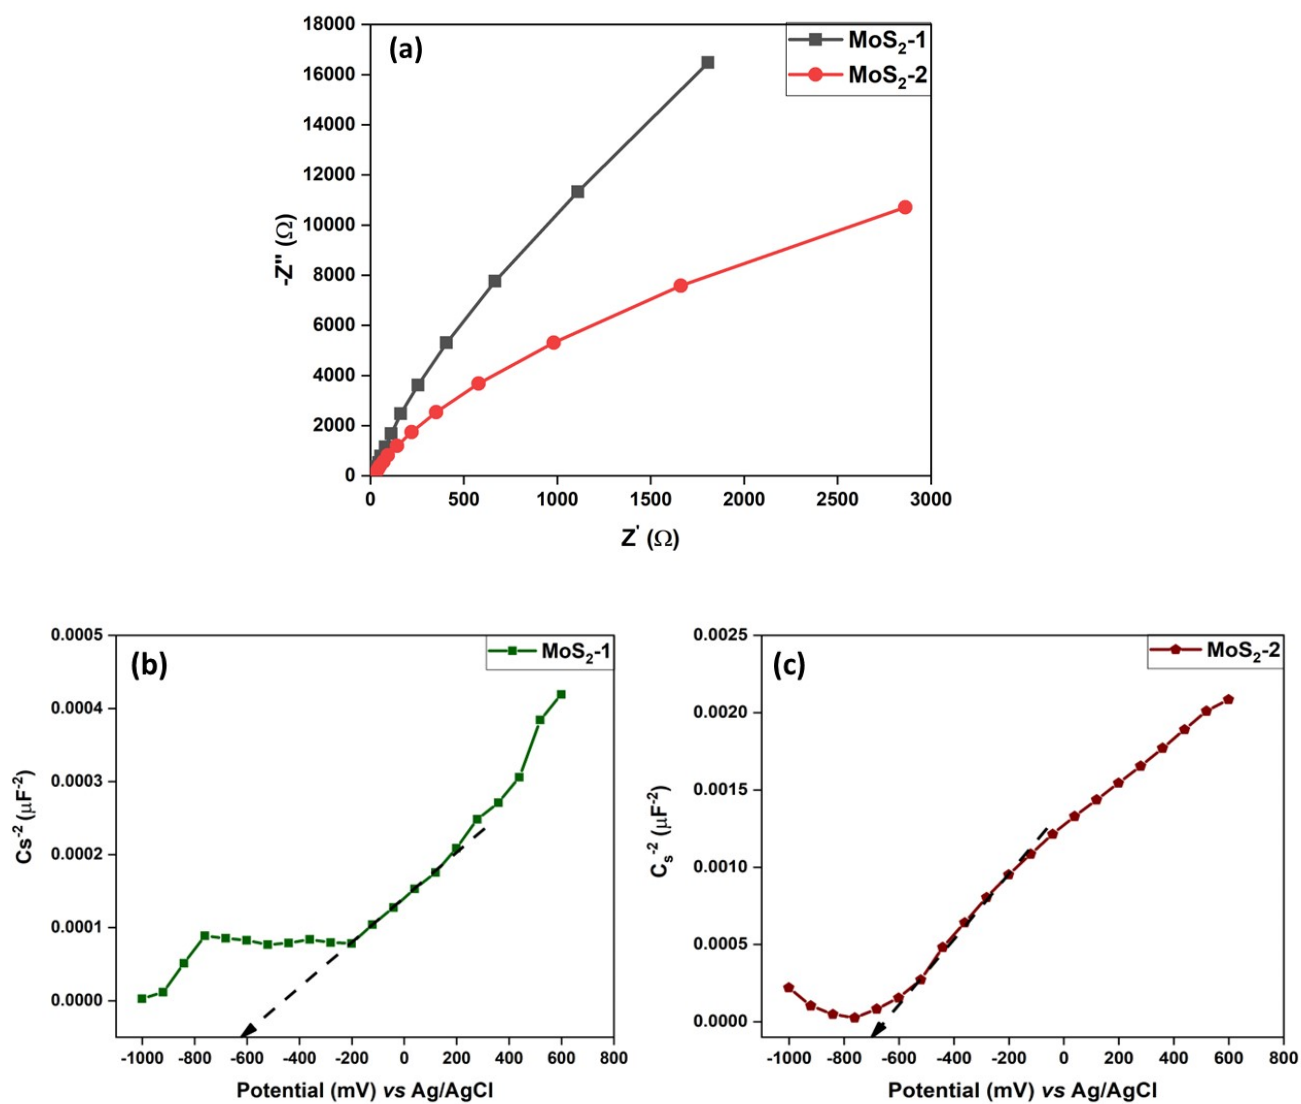

**Fig. S7.** (a) EIS spectra; (b, c) Mott-Schottky Plots of MoS<sub>2</sub> samples.

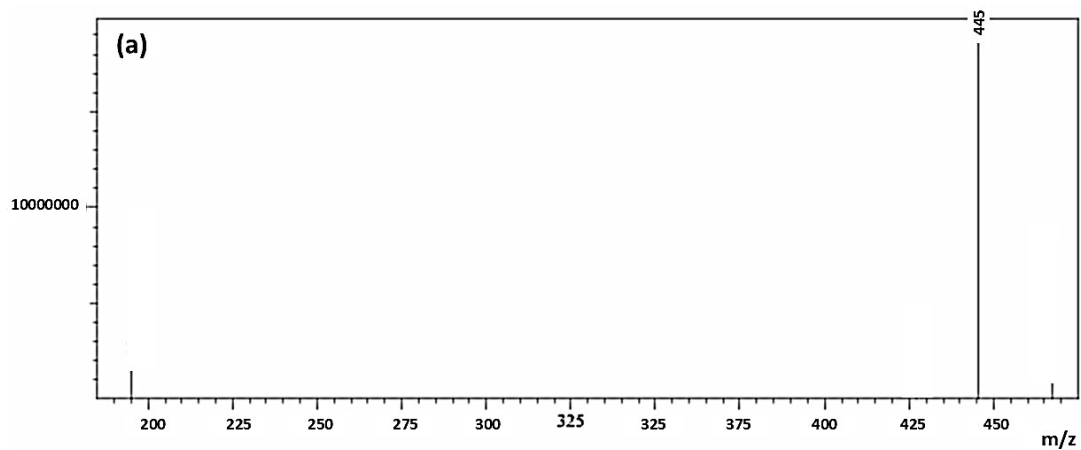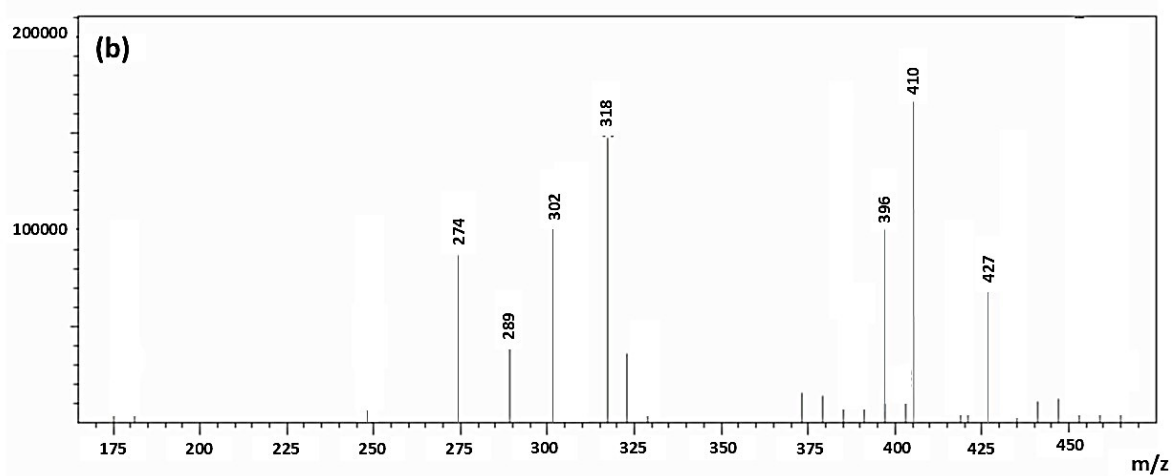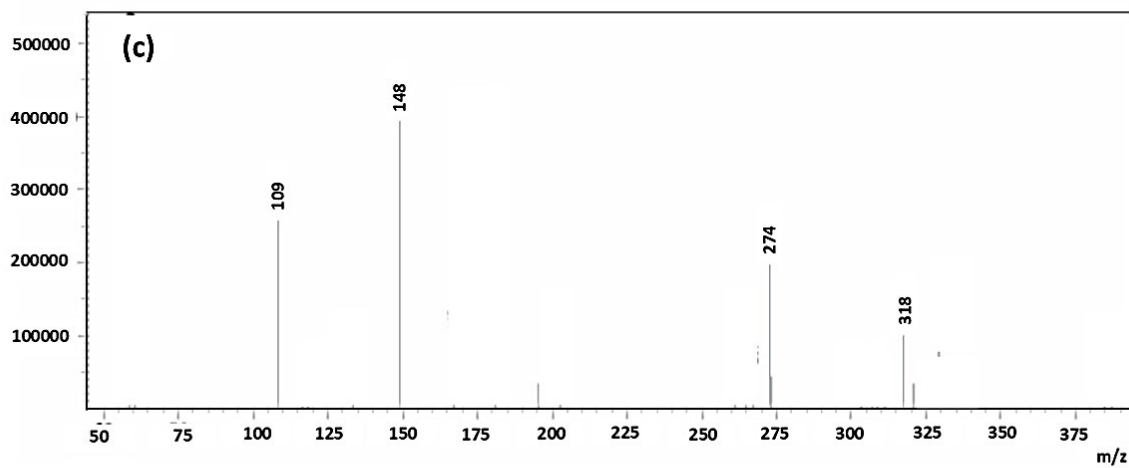

Fig. S8. (a-c) LC-MS/MS Analysis of the TC

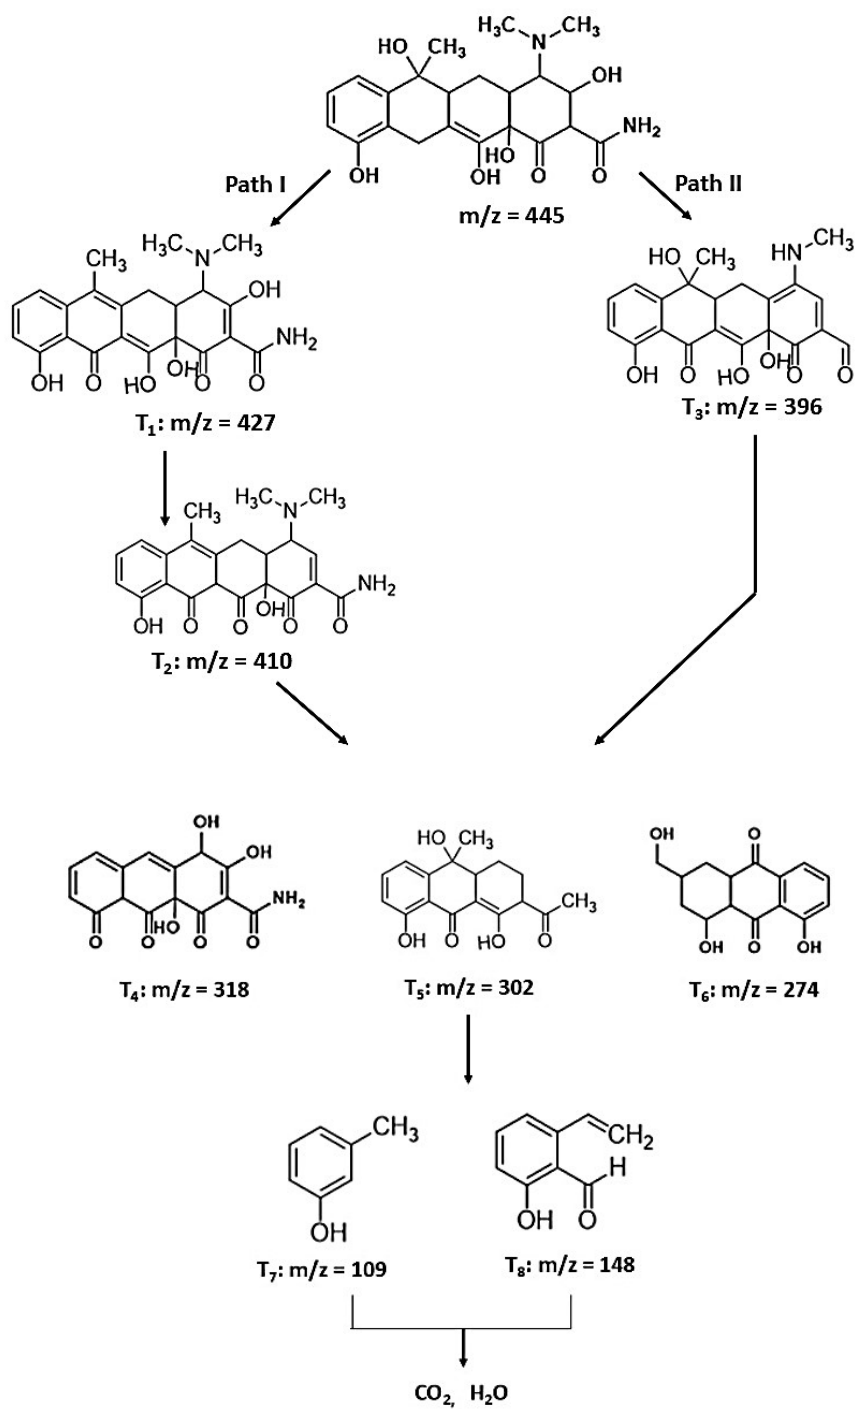

**Fig. S9.** Degradation pathway of TC.

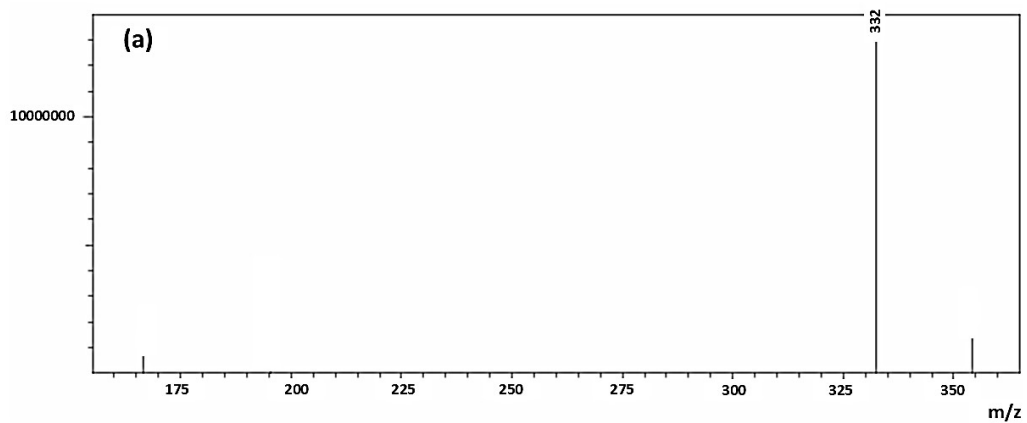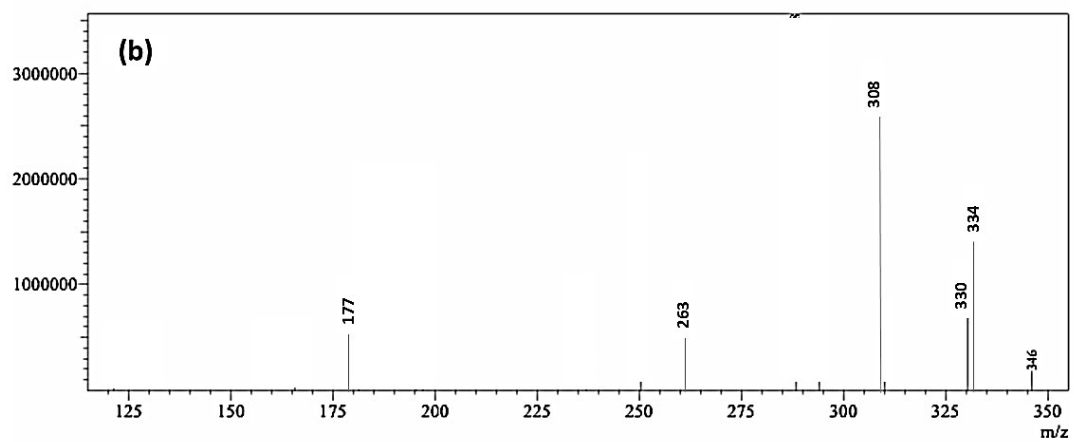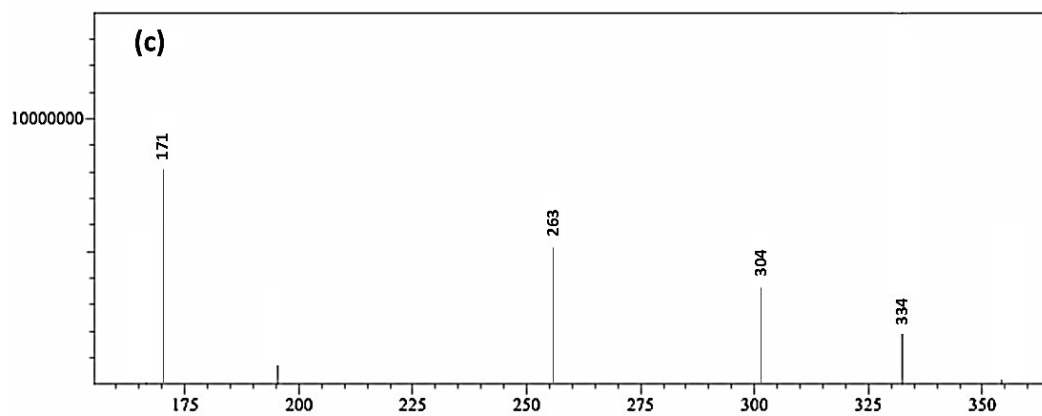

**Fig. S10.** (a-c) LC-MS/MS Analysis of CIP.

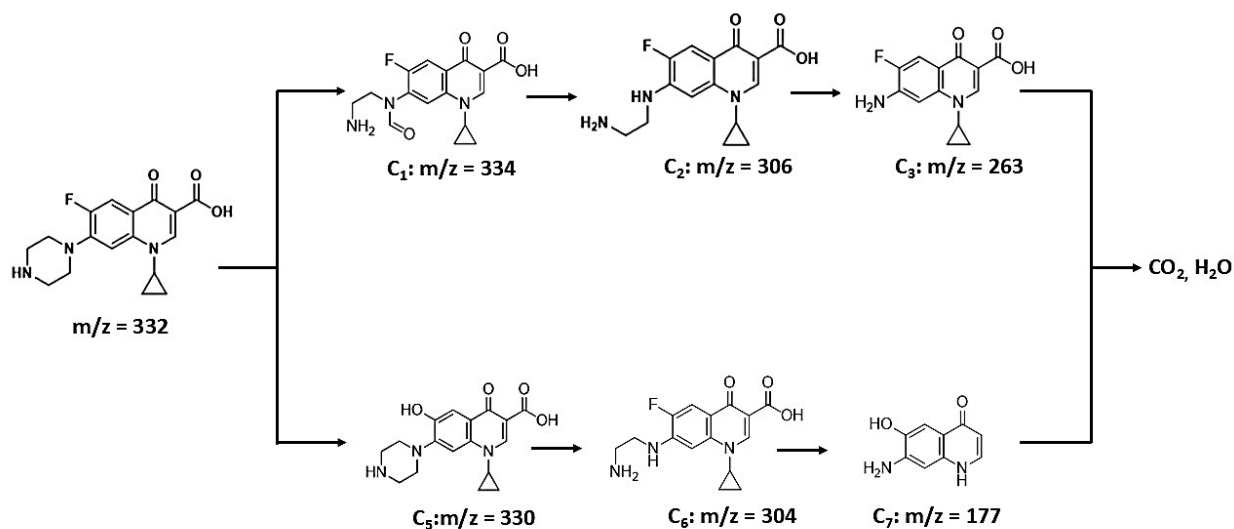

Fig. S11. Degradation pathway of CIP.

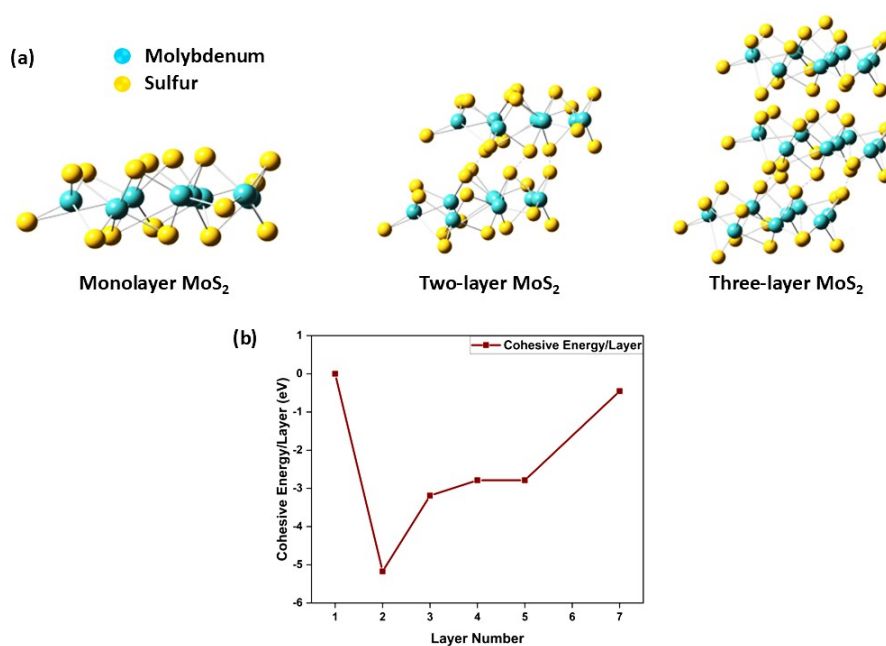

Fig. S12. (a) Optimized DFT structures of 1, 2 and 3-layered MoS<sub>2</sub>; (b) Cohesive energy variation with MoS<sub>2</sub> layer numbers.

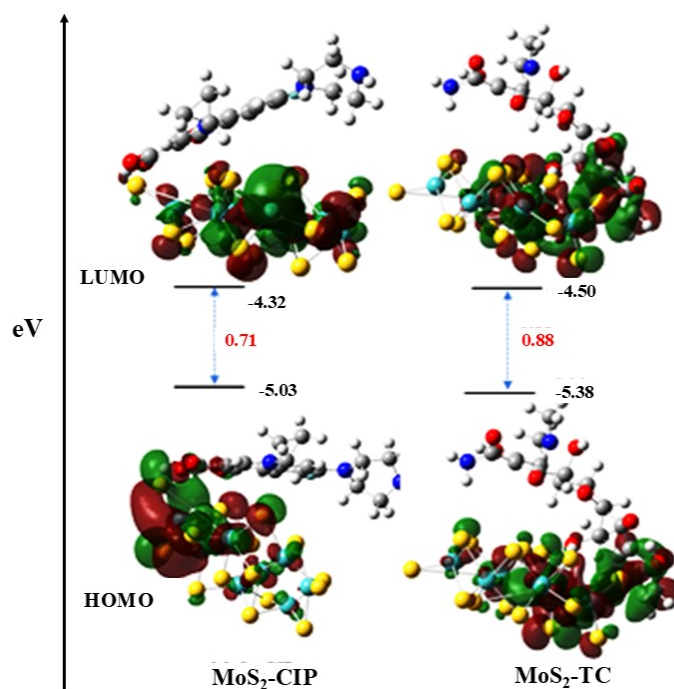

**Fig. S13.** (a) Frontier molecular orbital (FMO) Analysis of TC–MoS<sub>2</sub> and CIP–MoS<sub>2</sub> complexes showing the corresponding HOMO–LUMO gaps.

## References

1. M. J. Frisch, G. W. Trucks, H. B. Schlegel, G. E. Scuseria, M. A. Robb, J. R. Cheeseman, G. Scalmani, V. Barone, G. A. Petersson, and H. Nakatsuji, Gaussian 16 Revision C. 01. 2016, Gaussian Inc., 2016.
2. C. C. Yang, and S. Li. *J. Phys. Chem. C.*, 2009, **113**, 14207-14212.
3. R. Dennington, T. A. Keith, J. M. Millam, GaussView Version 6.1.1, 2019, Semichem Inc. Shawnee Mission KS, 2019
4. T. Lu, and F. Chen, *J. Comput. Chem.*, 2012, **33**, 580–592.
5. W. Humphrey, A. Dalke, and K. Schulten, *J. Mol. Graph.*, 1996, **14**, 33–38.
6. C. P. Prathibha, D. Yashaswini, P. Indhushree, M. R. Lavanya, *RSC Appl. Interfaces*, 2026, **3**, 125-134.
7. V. Salve, P. Agale, S. Balgude, S. Mardikar, S. Dhotre, P. More, *RSC Adv.*, 2025, **15**, 15651-15669.
8. B. R. Anusha, S. Appu, F. Alharethy, G. S. Reddy, M. A. Sangamesha, G. Nagaraju, K. Prashantha, *J. Phys. Chem. Solids.*, 2025, **198**, 112444.
9. T. H. Nguyen, T. D. Cao, T. P. Mai, V. H. Tran, V. T. Pham, V. C. Nguyen, V. T. Nguyen, *RSC Adv.*, 2025, **15**, 25548-25559.
10. I. Altin, R. C. Öztürk, M. Sökmen, I. Altinok, *ChemistrySelect*, 2026, **11**, e05912.
11. L. Chen, C. W. Chen, C. D. Dong, *Chemosphere*, 2025, **370**, 143990.
12. A. Kumar, S. Thakur, R. Kaur, P. Wang, *Surf. Interfaces.*, 2026, **84**, 108546.
13. D. R. Rout, A. Kumar, S. Rtimi, *J. Mater. Chem. A.*, 2025, **13**, 32300-32321.

14. C. Das, T. Shafi, L. P. Thulluru, M. Naushad, B. K. Dubey, S. Chowdhury, *ACS ES&T Water*, 2024, **4**, 2144-2158.
15. C. Das, T. Shafi, B. K. Dubey, S. Chowdhury, *Ind. Eng. Chem. Res.*, 2025, **64**, 7013-7024.
16. O. C. Olatunde, T. L. Yusuf, N. Mabuba, D. C. Onwudiwe, S. Makgato, *S. J. Water Process Eng.*, 2024, **59**, 105074.
17. X. Liu, K. Papadikis, P. S. Yap, G. Dawson, *J. Environ. Chem. Eng.*, 2025, **13**, 119704.
18. C. Fei, Z. Dong, H. Zhou, T. Xu, K. Tang, Y. Fan, R. Mao, *J. Colloid Interface Sci.*, 2025, **697**, 137920.
19. T. T. Nguyen, J. Singh, V. A. Nguyen, T. L. G. Hoang, P. Nguyen-Tri, *Langmuir*, 2025, **41**, 14229-14243.
20. H. A. Siddiq, A. Alhifhi, R. Ghubayra, M. Madkour, *J. Photochem. Photobiol. A-Chem.*, 2025, **459**, 116073.
21. N. Akhtar, C. Choi, M. Ateeq, P. Fazil, N. S. Shah, J. A. Khan, C. Han, *Chem. Eng. J.*, 2025, **507**, 160336.
22. Q. Chen, C. Liu, R. Liu, Y. Hou, J. Bi, J. C. Yu, L. Wu, *Sep. Purif. Technol.*, 2025, **355**, 129768.
23. I. Mukherjee, V. Cilamkoti, R. K. Dutta, *ACS Appl. Nano Mater.*, 2021, **4**, 7686-7697.
24. Z. Nasari, M. Taherimehr, *Langmuir*, 2023, **39**, 14357-14373.
25. C. Naga Lakshmi, M. Irfan, N. Singh, *Ind. Eng. Chem. Res.*, 2026, **65**, 1102-1114
26. G. Zuo, H. Ye, J. Du, X. Ding, *J. Nanopart. Res.*, 2025, **27**, 175.
